# Supplementary material
Source: HighWire-hosted journal article supplement (https://erj.ersjournals.com/content/53/5/1801090)
Supplement: inline-supplementary-material-1 [file inline-supplementary-material-1.pdf]

**Online data supplement**

**Prescribed analgesics in pregnancy and risk of childhood asthma**

Seif O Shaheen, Cecilia Lundholm, Bronwyn K Brew, Catarina Almqvist.

**Figure E1: Data available for analysis**

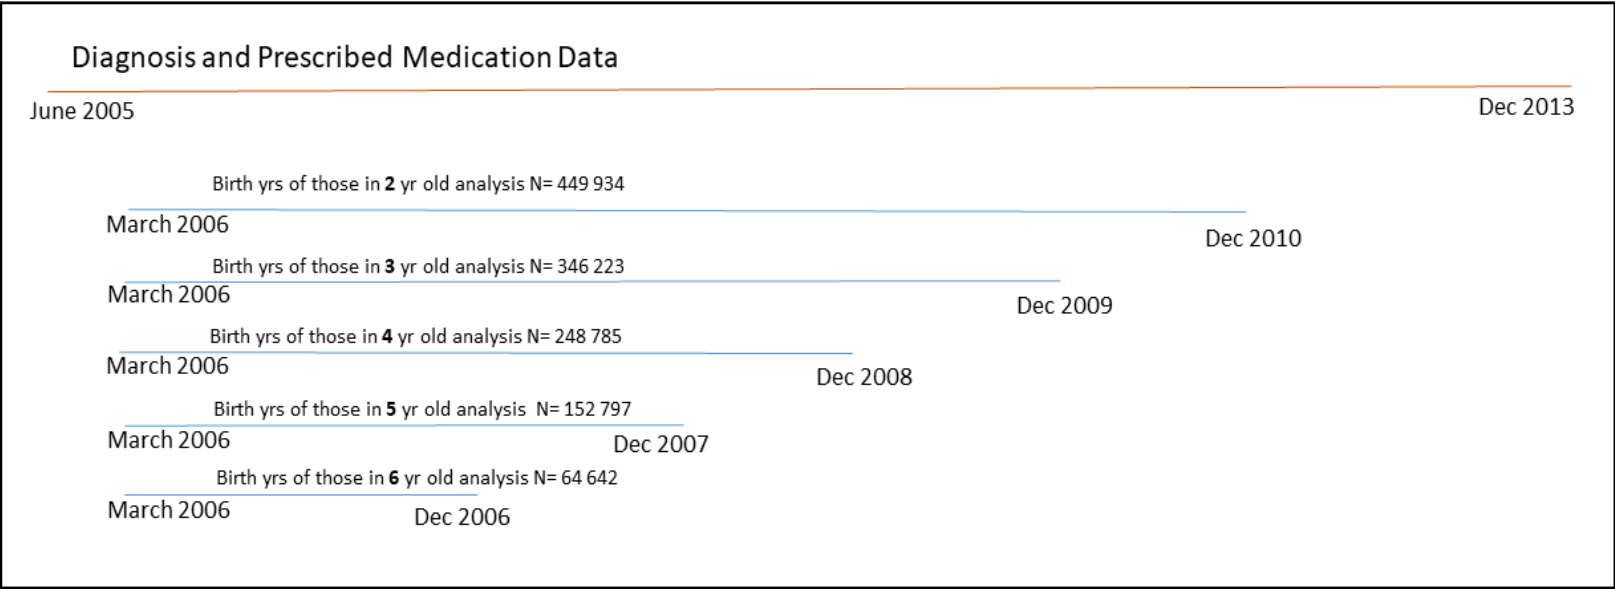

Footnote: Numbers refer to adjusted analyses (complete data on covariates)

**Table E1. Three classes of analgesics included in the analyses**

|               | ATC codes | Generic drug name                                        |
|---------------|-----------|----------------------------------------------------------|
| Opioids       | N02AA59   | Codeine, combinations excluding psycholeptics            |
|               | N02AA79   | Codeine, combinations with psycholeptics                 |
|               | N02AA08   | Dihydrocodeine                                           |
|               | N02AA58   | Dihydrocodeine, combinations                             |
|               | N02AC04   | Dextropropoxyphene                                       |
|               | N02AC54   | Dextropropoxyphene, combinations excluding psycholeptics |
|               | N02AX02   | Tramadol                                                 |
| Anti-migraine | N02CA01   | Dihydroergotamine                                        |
|               | N02CA02   | Ergotamine                                               |
|               | N02CA04   | Methysergide                                             |
|               | N02CA07   | Lisuride                                                 |
|               | N02CA51   | Dihydroergotamine, combinations                          |
|               | N02CA52   | Ergotamine, combinations excluding psycholeptics         |
|               | N02CA72   | Ergotamine, combinations with psycholeptics              |
|               | N02CC01   | Sumatriptan                                              |
|               | N02CC02   | Naratriptan                                              |
|               | N02CC03   | Zolmitriptan                                             |
|               | N02CC04   | Rizatriptan                                              |
|               | N02CC05   | Almotriptan                                              |
|               | N02CC06   | Eletriptan                                               |
|               | N02CC07   | Frovatriptan                                             |
|               | N02CX01   | Pizotifen                                                |
|               | N02CX02   | Clonidine                                                |
|               | N02CX03   | Ipazochrome                                              |
|               | N02CX05   | Dimetotiazine                                            |
|               | N02CX06   | Oxetorone                                                |
|               | N02CB01   | Flumetoxone                                              |
| Paracetamol   | N02BE01   | Paracetamol                                              |
|               | N02BE51   | Paracetamol, combinations excluding psycholeptics        |
|               | N02BE71   | Paracetamol, combinations with psycholeptics             |

**Table E2. Frequency of analgesic classes prescribed to the mother during pregnancy**

| Opioids | Anti-migraine | Paracetamol | N       | %    |
|---------|---------------|-------------|---------|------|
| No      | No            | No          | 459,690 | 93.2 |
| No      | No            | Yes         | 9,091   | 1.8  |
| Yes     | No            | No          | 15,405  | 3.1  |
| No      | Yes           | No          | 2,343   | 0.5  |
| Yes     | No            | Yes         | 5,091   | 1.0  |
| No      | Yes           | Yes         | 225     | 0.0  |
| Yes     | Yes           | No          | 829     | 0.2  |
| Yes     | Yes           | Yes         | 325     | 0.1  |

**Table E3. Associations between prescribed analgesics in pregnancy and childhood asthma/wheeze (whole cohort; unadjusted analysis)**

| Asthma/wheeze |          | Opioids         |              | Anti-migraine   |              | Paracetamol     |              |
|---------------|----------|-----------------|--------------|-----------------|--------------|-----------------|--------------|
| Age (years)   | n        | OR <sup>1</sup> | (95% CI)     | OR <sup>1</sup> | (95% CI)     | OR <sup>1</sup> | (95% CI)     |
| 2             | 492, 999 | 1.72            | (1.64, 1.79) | 1.50            | (1.34, 1.67) | 1.71            | (1.62, 1.80) |
| 3             | 381 729  | 1.67            | (1.59, 1.76) | 1.55            | (1.37, 1.75) | 1.75            | (1.65, 1.86) |
| 4             | 276 333  | 1.58            | (1.49, 1.68) | 1.42            | (1.22, 1.65) | 1.65            | (1.54, 1.78) |
| 5             | 173 131  | 1.61            | (1.48, 1.74) | 1.74            | (1.45, 2.09) | 1.67            | (1.52, 1.83) |
| 6             | 72 778   | 1.65            | (1.45, 1.87) | 1.78            | (1.32, 2.39) | 1.71            | (1.48, 2.00) |

**Table E4. Associations between prescribed analgesics in pregnancy and childhood asthma/wheeze (whole cohort), mutually adjusted for the other analgesics**

| Asthma/wheeze |         | Opioids         |             | Anti-migraine   |             | Paracetamol     |             |
|---------------|---------|-----------------|-------------|-----------------|-------------|-----------------|-------------|
| Age (years)   | n       | OR <sup>1</sup> | (95% CI)    | OR <sup>1</sup> | (95% CI)    | OR <sup>1</sup> | (95% CI)    |
| 2             | 449 934 | 1.37            | (1.30-1.44) | 1.15            | (1.03-1.30) | 1.34            | (1.26-1.43) |
| 3             | 346 223 | 1.33            | (1.26-1.41) | 1.21            | (1.06-1.38) | 1.41            | (1.32-1.51) |
| 4             | 248 785 | 1.29            | (1.20-1.38) | 1.07            | (0.91-1.27) | 1.34            | (1.24-1.36) |
| 5             | 152 797 | 1.30            | (1.18-1.42) | 1.34            | (1.09-1.65) | 1.36            | (1.21-1.51) |
| 6             | 64 642  | 1.28            | (1.11-1.49) | 1.27            | (0.90-1.80) | 1.33            | (1.11-1.58) |

<sup>1</sup> Odds ratio adjusted for maternal birth country, education, asthma, BMI in early pregnancy, parity, smoking during pregnancy, age at delivery and **mutual adjustment for the other analgesics**

**Table E5. Associations between prescribed analgesics in pregnancy and childhood asthma/wheeze (whole cohort), with exposure being defined by the drug having been dispensed at least twice during pregnancy**

| Asthma/wheeze |         | Opioids         |             | Anti-migraine   |             | Paracetamol     |             |
|---------------|---------|-----------------|-------------|-----------------|-------------|-----------------|-------------|
| Age (years)   | n       | OR <sup>1</sup> | (95% CI)    | OR <sup>1</sup> | (95% CI)    | OR <sup>1</sup> | (95% CI)    |
| 2             | 449 934 | 1.57            | (1.44-1.71) | 1.39            | (1.16-1.67) | 1.61            | (1.47-1.76) |
| 3             | 346 223 | 1.59            | (1.44-1.75) | 1.39            | (1.12-1.72) | 1.70            | (1.54-1.89) |
| 4             | 248 785 | 1.50            | (1.34-1.70) | 1.29            | (0.99-1.68) | 1.68            | (1.48-1.91) |
| 5             | 152 797 | 1.47            | (1.26-1.72) | 1.60            | (1.16-2.22) | 1.61            | (1.35-1.90) |
| 6             | 64 642  | 1.54            | (1.22-1.96) | 1.18            | (0.65-2.15) | 1.68            | (1.29-2.18) |

<sup>1</sup> Odds ratio adjusted for maternal birth country, education, asthma, BMI in early pregnancy, parity, smoking during pregnancy and age at delivery

**Table E6. Odds ratios (OR) and 95% confidence intervals (CI) from logistic regression of asthma/wheeze at age 2-6 years by number of classes of analgesic drugs (opioids, anti-migraine, paracetamol)**

| Asthma/wheeze |         | Number of classes of analgesics |             |                 |             |                 |             |
|---------------|---------|---------------------------------|-------------|-----------------|-------------|-----------------|-------------|
|               |         | One                             |             | Two             |             | Three           |             |
| Age (years)   | n       | OR <sup>1</sup>                 | (95% CI)    | OR <sup>1</sup> | (95% CI)    | OR <sup>1</sup> | (95% CI)    |
| 2             | 449 934 | 1.42                            | (1.36-1.48) | 1.67            | (1.54-1.81) | 1.69            | (1.21-2.36) |
| 3             | 346 223 | 1.42                            | (1.35-1.49) | 1.61            | (1.44-1.81) | 2.00            | (1.38-2.90) |
| 4             | 248 785 | 1.34                            | (1.26-1.42) | 1.39            | (1.30-1.49) | 1.28            | (0.74-2.19) |
| 5             | 152 797 | 1.36                            | (1.26-1.48) | 1.69            | (1.45-1.28) | 1.94            | (1.03-3.68) |
| 6             | 64 642  | 1.36                            | (1.19-1.55) | 1.62            | (1.27-2.06) | 1.36            | (0.41-4.52) |

<sup>1</sup> Adjusted for maternal birth country, education, asthma, BMI in early pregnancy, parity, smoking during pregnancy and age at delivery

**Table E7. Associations between prescribed analgesics in pregnancy and childhood asthma/wheeze (first born children only)**

| Asthma/wheeze |          | Opioids         |              | Anti-migraine   |              | Paracetamol     |              |
|---------------|----------|-----------------|--------------|-----------------|--------------|-----------------|--------------|
| Age (years)   | n        | OR <sup>1</sup> | (95% CI)     | OR <sup>1</sup> | (95% CI)     | OR <sup>1</sup> | (95% CI)     |
| 2             | 197 505  | 1.48            | (1.37, 1.60) | 1.27            | (1.07, 1.52) | 1.51            | (1.37-1.66)  |
| 3             | 152 056  | 1.39            | (1.27, 1.52) | 1.40            | (1.16, 1.70) | 1.55            | (1.39, 1.72) |
| 4             | 109, 104 | 1.32            | (1.19, 1.47) | 1.32            | (1.05, 1.67) | 1.45            | (1.28, 1.66) |
| 5             | 66 552   | 1.41            | (1.23, 1.62) | 1.51            | (1.12, 2.03) | 1.48            | (1.25, 1.75) |
| 6             | 28 156   | 1.45            | (1.17, 1.80) | 1.40            | (0.85, 2.31) | 1.54            | (1.18, 2.02) |

<sup>1</sup> Odds ratio adjusted for maternal birth country, education, asthma, BMI in early pregnancy, smoking during pregnancy and age at delivery

**Table E8: Age-varying hazard ratios (HR) from Cox proportional hazards regression of association between incident maternal analgesic prescription and asthma/wheeze incidence**

| <b>a. HRs adjusted for measured confounders<sup>1</sup> (n=656,440, events=55,761)</b> |         |              |               |              |             |              |
|----------------------------------------------------------------------------------------|---------|--------------|---------------|--------------|-------------|--------------|
| Age band<br>(years)                                                                    | Opioids |              | Anti-migraine |              | Paracetamol |              |
|                                                                                        | HR      | (95% CI)     | HR            | (95% CI)     | HR          | (95% CI)     |
| 0-1                                                                                    | 1.52    | (1.44, 1.60) | 1.32          | (1.16, 1.51) | 1.57        | (1.48, 1.67) |
| 1-2                                                                                    | 1.46    | (1.38, 1.55) | 1.27          | (1.10, 1.46) | 1.37        | (1.28, 1.47) |
| >2                                                                                     | 1.35    | (1.26, 1.44) | 1.44          | (1.25, 1.67) | 1.37        | (1.27, 1.48) |

  

| <b>b. Sibling comparison: HRs adjusted for factors shared by siblings, using stratified models, and measured confounders not shared by siblings<sup>2</sup> (n=658,898, events=55,990)</b> |         |              |               |              |             |              |
|--------------------------------------------------------------------------------------------------------------------------------------------------------------------------------------------|---------|--------------|---------------|--------------|-------------|--------------|
| Age band<br>(years)                                                                                                                                                                        | Opioids |              | Anti-migraine |              | Paracetamol |              |
|                                                                                                                                                                                            | HR      | (95% CI)     | HR            | (95% CI)     | HR          | (95% CI)     |
| 0-1                                                                                                                                                                                        | 1.10    | (0.97, 1.27) | 1.28          | (0.90, 1.82) | 1.11        | (0.95, 1.29) |
| 1-2                                                                                                                                                                                        | 0.96    | (0.81, 1.14) | 0.70          | (0.45, 1.11) | 1.03        | (0.84, 1.27) |
| >2                                                                                                                                                                                         | 0.94    | (0.73, 1.21) | 1.12          | (0.59, 2.13) | 0.88        | (0.64, 1.21) |

<sup>1</sup> maternal birth country, education, asthma, BMI in early pregnancy, parity, smoking during pregnancy and age at delivery

<sup>2</sup> BMI in early pregnancy, parity, smoking during pregnancy and age at delivery
